# Supplementary material for: Selective methanethiol-to-olefins conversion over HSSZ-13 zeolite
Source: Royal Society of Chemistry journal article supplement (doi:10.1039/d1cc00397f), 2021-01-01
Supplement: d1cc00397f1.pdf [file d1cc00397f1.pdf]

Electronic Supplementary Information

**Selective Methanethiol-to-Olefins Conversion over HSSZ-13 Zeolite**

*Miao Yu, Nicolás Tormene, Aleksei Bolshakov, Brahim Mezari, Anna Liutkova, Nikolay Kosinov\*  
and Emiel J.M. Hensen\**

## Experimental section

### Catalysts preparation

Commercial zeolite powders NH<sub>4</sub>ZSM-5 (Si/Al = 40) and NH<sub>4</sub>FER (Si/Al = 10) were purchased from Alfa Aesar and zeolite NH<sub>4</sub>BEA (Si/Al = 12) was purchased from Akzo Nobel. Zeolite NaSSZ-13 (Si/Al = 18.7) was synthesized according to a previously reported procedure.<sup>[1]</sup> The proton forms of the commercial zeolites were obtained by calcination in a shallow-bed configuration at 550 °C for 4 h. The proton form of SSZ-13 was obtained by 3 consecutive ion-exchange steps with a 1.0 M solution of NH<sub>4</sub>NO<sub>3</sub> for 3 h at 70 °C, followed by drying overnight at 110 °C and calcination at 550 °C for 4 h. Prior to catalytic activity measurements, the zeolite catalysts were pelletized, crushed and sieved to obtain particles with a size in the range of 0.25 – 0.5 mm.

### Catalytic activity measurements

An amount of 0.1 g zeolite powder was loaded between two quartz wool plugs in a tubular quartz reactor (i.d. = 4 mm, o.d. = 8 mm, l = 250 mm). The zeolite catalyst was first calcined in a flow of 20 vol% O<sub>2</sub> in He at 550 °C for 1 h. Two different reaction feed mixtures were used, either CH<sub>3</sub>SH and N<sub>2</sub> or CH<sub>3</sub>OH and N<sub>2</sub>. CH<sub>3</sub>SH and N<sub>2</sub> were fed to the reactor using thermal mass flow controllers. CH<sub>3</sub>OH (Merck, 99%) was introduced into the reactor by flowing the N<sub>2</sub> stream through a thermostated saturator containing CH<sub>3</sub>OH. The gas-phase products were analyzed by an online gas chromatograph (CGC, Interscience) equipped with 2 columns and detectors: (i) Rtx-1 column: l = 15 m, i.d. = 0.32 mm, FID: CH<sub>3</sub>SH, CH<sub>3</sub>SCH<sub>3</sub> and hydrocarbons; (ii) Rt-QBond column, l = 12 m, i.d. = 0.32 mm, TCD: N<sub>2</sub>; (iii) Molsieve 5A column (l = 7 m, i.d. = 0.32 mm) TCD: H<sub>2</sub>S. In order to analyze heavier products, the effluent stream was directed to a diethylene glycol trap. The obtained solution was analyzed by offline gas chromatography-mass spectrometry (GC-MS, Shimadzu GC-17A) equipped with a Stabilwax column (l = 30 m, i.d. = 0.32 mm).

### Catalysts characterization

**XRD.** X-ray diffraction (XRD) patterns of zeolite catalysts were collected on a Bruker D2 Phaser using Cu K $\alpha$  radiation in the  $2\theta$  range of 5 - 50° with a step size of 0.02° s<sup>-1</sup> and time step size of 0.4 s.

**Ar physisorption.** Ar adsorption/desorption isotherms were measured at -186 °C with a Micromeritics ASAP-2020 instrument. The zeolite catalysts were pretreated at 500 °C for 6 h under vacuum prior to the measurements. The *t*-plot method was used to calculate the microporous volume. The BET surface area was determined in the relative pressure range 0.05 - 0.25.

**SEM.** Scanning electron microscopy (SEM) images of the zeolites were taken on a FEI Quanta 200F scanning electron microscope at an accelerating voltage of 2 kV.

**Pyridine-adsorption IR spectroscopy.** Pyridine-adsorption IR spectra of zeolites were recorded on a Bruker Vertex 70v spectrometer in the range of 4000 - 800 cm<sup>-1</sup>. Spectra were acquired at 4 cm<sup>-1</sup> resolution as an average of 64 scans. The samples were prepared as thin wafers with a density of ~ 9 mg/cm<sup>2</sup> and placed inside a controlled-environment transmission IR cell with CaF<sub>2</sub> windows. After calcination at 530 °C in air flow, a background spectrum was collected at 150 °C and a pressure < 10<sup>-5</sup> mbar. Then, pyridine was introduced into the cell. Desorption was carried out under vacuum at 150 °C, 300 °C and 500 °C using a dwell time of 1 h at each temperature. The IR spectra were collected at 150 °C.

**NMR spectroscopy.** Solid-state magic-angle spinning nuclear magnetic resonance (MAS NMR) spectra were recorded using an 11.7 Tesla Bruker DMX500 NMR spectrometer, operated at 132 MHz, 500 MHz and 125 MHz for  $^{27}\text{Al}$ ,  $^1\text{H}$  and  $^{13}\text{C}$ , respectively.  $^{27}\text{Al}$  MAS NMR spectra were recorded with a spinning rate of 25 kHz and a single excitation pulse length of 1  $\mu\text{s}$  with a 1 s repetition time. The reference signal for the  $^{27}\text{Al}$  chemical shift was a saturated solution of  $\text{Al}(\text{NO}_3)_3$ . One-dimensional  $^{13}\text{C}\{^1\text{H}\}$  cross polarization (CP) and two-dimensional  $^1\text{H}\text{-}^{13}\text{C}\{^1\text{H}\}$  HETCOR (Heteronuclear Correlation) MAS NMR spectra were recorded with a ramped contact pulse of 3 ms and an interscan delay of 3 s.  $^{13}\text{C}$  Direct Excitation (DE) spectra were measured using a high power proton decoupling Hahn Echo pulse sequence p1- $\tau$ 1-p2- $\tau$ 2-aq with a  $90^\circ$  pulse p1=5  $\mu\text{sec}$ , a  $180^\circ$  pulse p2=10  $\mu\text{sec}$  and an interscan delay of 10 sec.  $^{13}\text{C}$  NMR spectra were recorded at spinning rate of 8 kHz.  $^1\text{H}$  shifts were calibrated using tetramethylsilane (TMS). Solid adamantane was used for the  $^{13}\text{C}$  NMR shift calibration.

**XPS.** X-ray photoelectron spectroscopy (XPS) was performed using a Thermo Fischer K-Alpha spectrometer, equipped with a monochromatic X-ray source ( $\text{Al K}\alpha = 1486.6 \text{ eV}$ ), and a delay line detector. Used catalysts were dispersed on alumina sample holders coated with carbon tape in a nitrogen-filled glovebox ( $\text{H}_2\text{O} < 1 \text{ ppm}$ ,  $\text{O}_2 < 1 \text{ ppm}$ ). The samples were transferred to the XPS apparatus using a protective atmosphere transport vessel. The background pressure prior to analysis was  $2 \times 10^{-9}$  mbar. Survey scans were collected at a constant pass energy of 160 eV, region scans at 40 eV. The spectra were fitted using the CasaXPS software. The main C 1s signal served as an energy reference and was set at 284.8 eV.

**TG-MS.** The thermal gravimetric and mass spectrometry (TG-MS) analysis of used catalysts was performed with a Mettler Toledo TGA-DSC 1 instrument coupled to a mass spectrometer (Pfeiffer Vacuum, OmniStar GSD 300). The used catalysts (~10 mg) was placed in an alumina crucible and then heated up to 700  $^\circ\text{C}$  with a ramp rate of 5  $^\circ\text{C}/\text{min}$  in 40 mL/min He and 20 mL/min  $\text{O}_2$  flow.

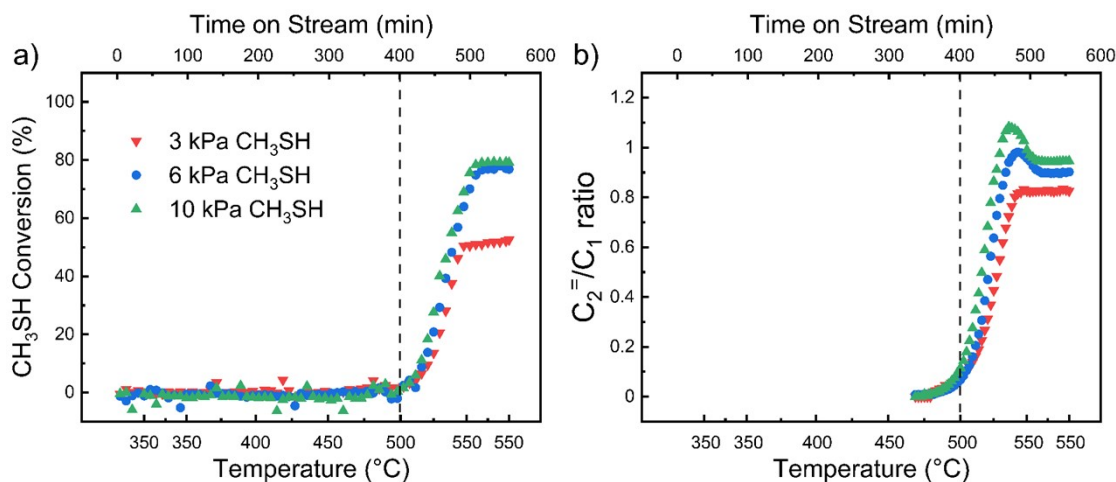

**Figure S1.** (a) CH<sub>3</sub>SH conversion and (b) C<sub>2</sub><sup>-</sup>/C<sub>1</sub> ratio (carbon-based) during thermal decomposition of CH<sub>3</sub>SH (3 kPa, 6 kPa, and 10 kPa CH<sub>3</sub>SH in N<sub>2</sub>). The total flow rate was 5 mL/min, the temperature was increased from 350 °C to 550 °C at a rate of 0.5 °C/min.

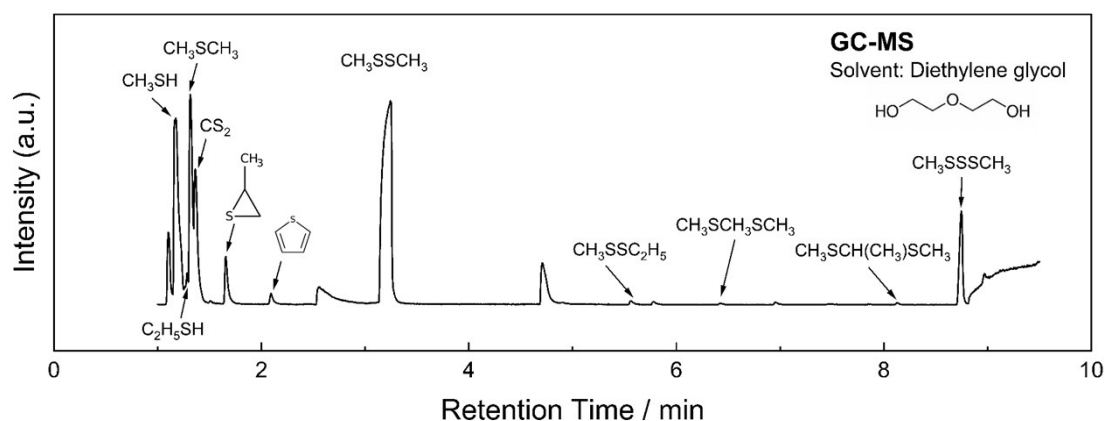

**Figure S2.** GC-MS analysis of the products of CH<sub>3</sub>SH thermal decomposition (reaction at 550 °C) collected in diethylene glycol.

Below 500 °C (Fig. S1), the non-catalytic conversion of CH<sub>3</sub>SH is negligible, while conversion strongly increase from 5% to 75%, when the temperature is raised from 500 °C to 550 °C. Under these conditions the main hydrocarbon products in the gas phase are CH<sub>4</sub> and C<sub>2</sub>H<sub>4</sub>. The carbon-based C<sub>2</sub>H<sub>4</sub>/CH<sub>4</sub> ratio reached a maximum value of ~1 at a CH<sub>3</sub>SH partial pressure of 10 kPa and a temperature in the range of 520 – 530 °C. The C<sub>2</sub>H<sub>4</sub>/CH<sub>4</sub> ratio increased with the CH<sub>3</sub>SH partial pressure. Analysis of the condensable gases (Fig. S2) showed a range of other products such as CS<sub>2</sub>, CH<sub>3</sub>SCH<sub>3</sub>, CH<sub>3</sub>SSCH<sub>3</sub>, CH<sub>3</sub>SSSCH<sub>3</sub>, C<sub>2</sub>H<sub>5</sub>SH, CH<sub>3</sub>SSC<sub>2</sub>H<sub>5</sub> and thiophene. A representative gas chromatogram is shown in Fig. S2. These findings demonstrate that selective catalytic conversion of CH<sub>3</sub>SH can only be achieved below 500 °C where thermal decomposition can be avoided.

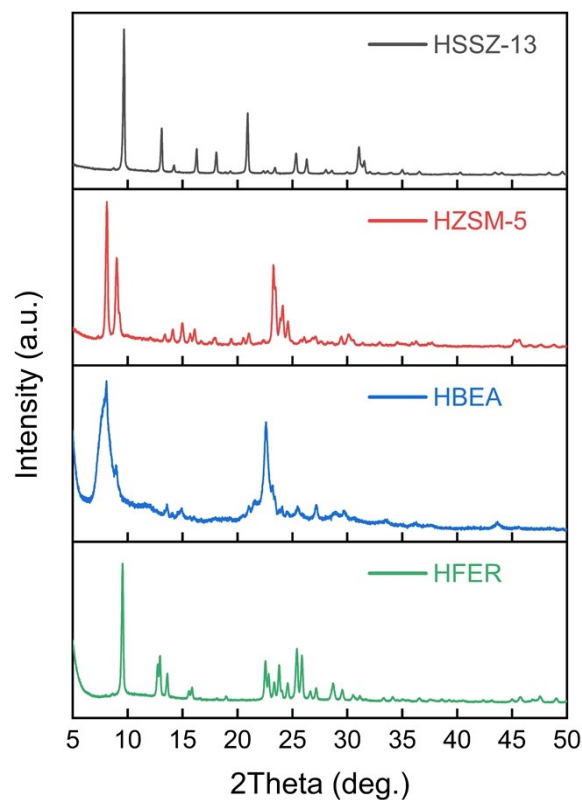

**Figure S3.** XRD patterns of calcined zeolite catalysts.

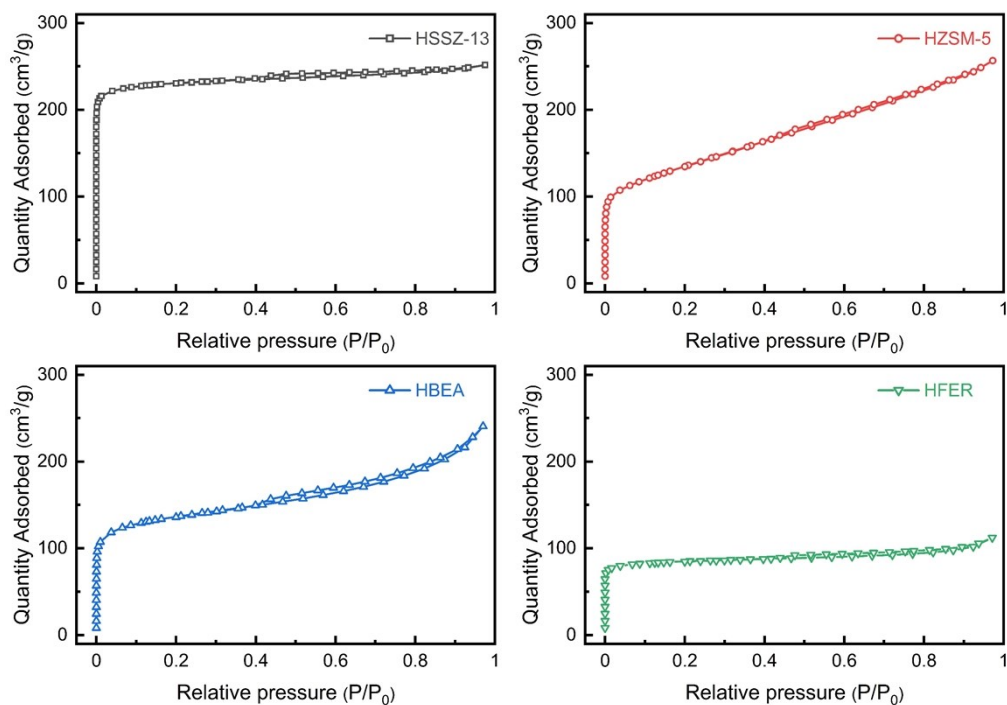

**Figure S4.** Ar physisorption isotherms of calcined zeolite catalysts.

**Table S1.** Textural properties of calcined zeolite catalysts determined by Ar physisorption.

| Sample  | $V_{\text{tot}}$<br>( $\text{cm}^3 \text{g}^{-1}$ ) | $V_{\text{micro}}$<br>( $\text{cm}^3 \text{g}^{-1}$ ) | $S_{\text{BET}}$<br>( $\text{m}^2 \text{g}^{-1}$ ) |
|---------|-----------------------------------------------------|-------------------------------------------------------|----------------------------------------------------|
| HSSZ-13 | 0.32                                                | 0.26                                                  | 701.6                                              |
| HZSM-5  | 0.33                                                | 0.05                                                  | 418.4                                              |
| HBEA    | 0.31                                                | 0.11                                                  | 420.5                                              |
| HFER    | 0.14                                                | 0.09                                                  | 258.8                                              |

$V_{\text{tot}}$  total pore volume at  $p/p_0 = 0.95$

$V_{\text{micro}}$  micropore volume calculated by the *t*-plot method

$S_{\text{BET}}$  Brunauer-Emmett-Teller (BET) surface area ( $p/p_0 = 0.05$ - $0.25$ )

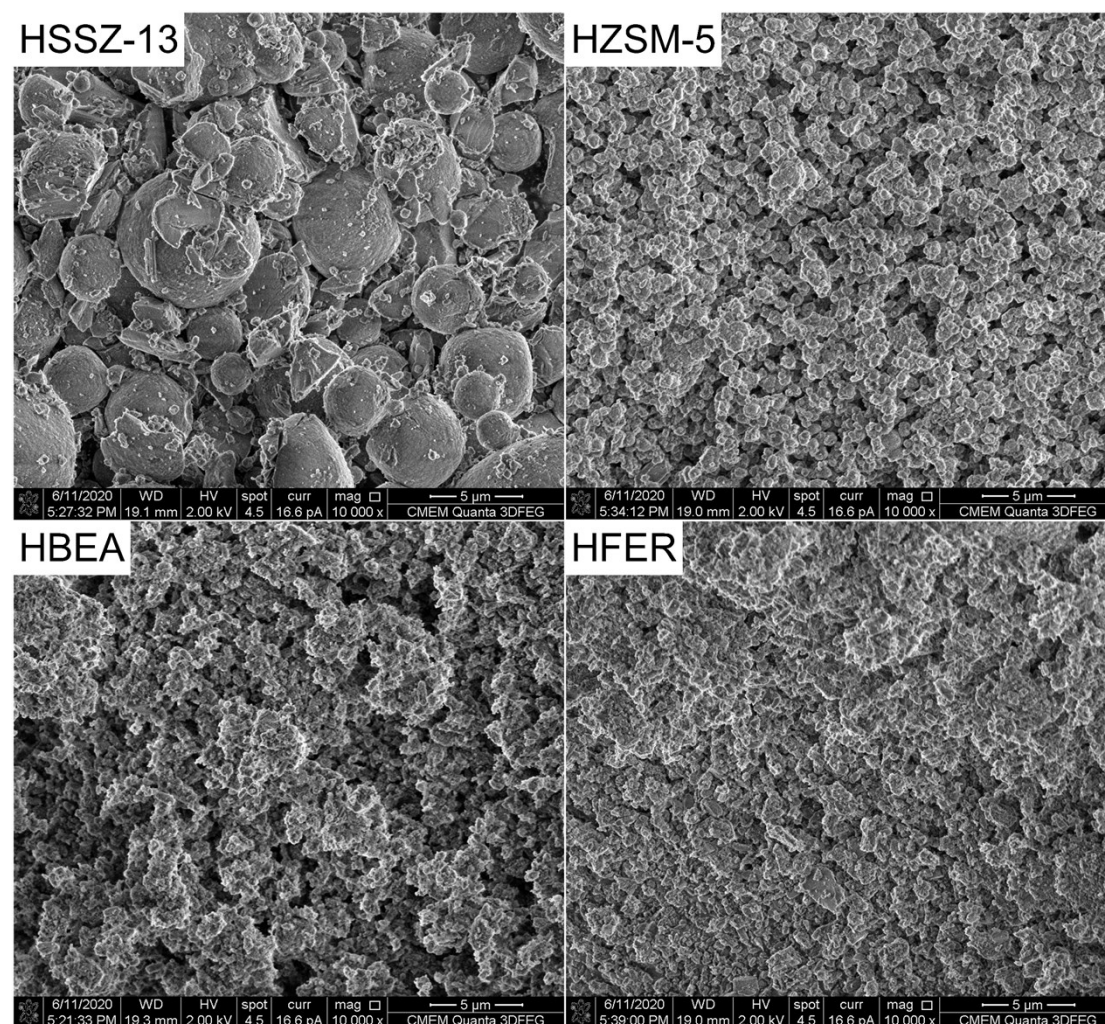

**Figure S5.** SEM images of calcined zeolite catalysts.

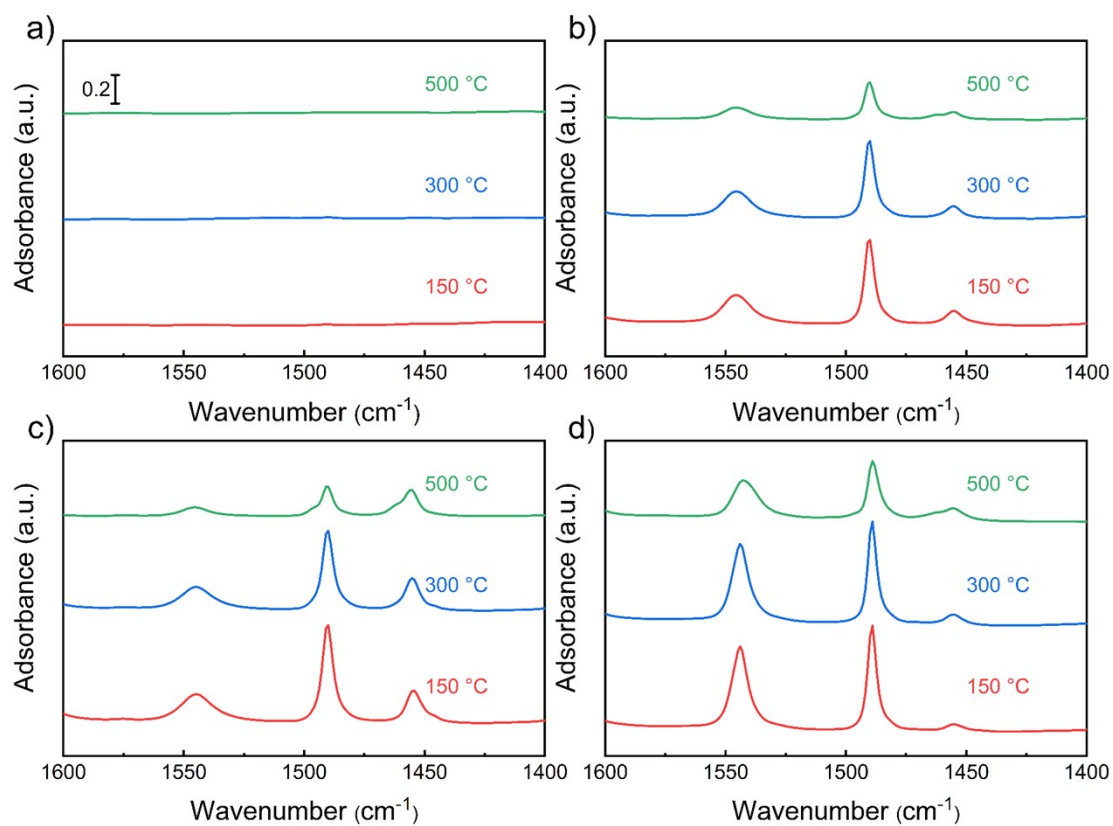

**Figure S6.** Pyridine adsorbed IR spectra of calcined (a) HSSZ-13, (b) HZSM-5, (c) HBEA, and (d) HFER after evacuation at 150 °C, 300 °C, and 500 °C.

**Table S2.** Acidic properties of calcined zeolite catalysts based on pyridine IR and  $^1\text{H}$  MAS NMR spectroscopy.

| Sample  | BAS (mmol/g) <sup>a</sup> |        |        | LAS (mmol/g) <sup>a</sup> |        |        | BAS (mmol/g) <sub>b</sub> |
|---------|---------------------------|--------|--------|---------------------------|--------|--------|---------------------------|
|         | 150 °C                    | 300 °C | 500 °C | 150 °C                    | 300 °C | 500 °C |                           |
| HSSZ-13 | -                         | -      | -      | -                         | -      | -      | 0.70                      |
| HZSM-5  | 0.48                      | 0.44   | 0.20   | 0.16                      | 0.14   | 0.11   | -                         |
| HBEA    | 0.81                      | 0.65   | 0.20   | 0.47                      | 0.39   | 0.32   | -                         |
| HFER    | 0.47                      | 0.36   | 0.13   | 0.03                      | 0.04   | 0.07   | -                         |

<sup>a</sup> determined by IR spectroscopy of pyridine adsorption

<sup>b</sup> determined from  $^1\text{H}$  MAS NMR spectroscopy<sup>[1]</sup>

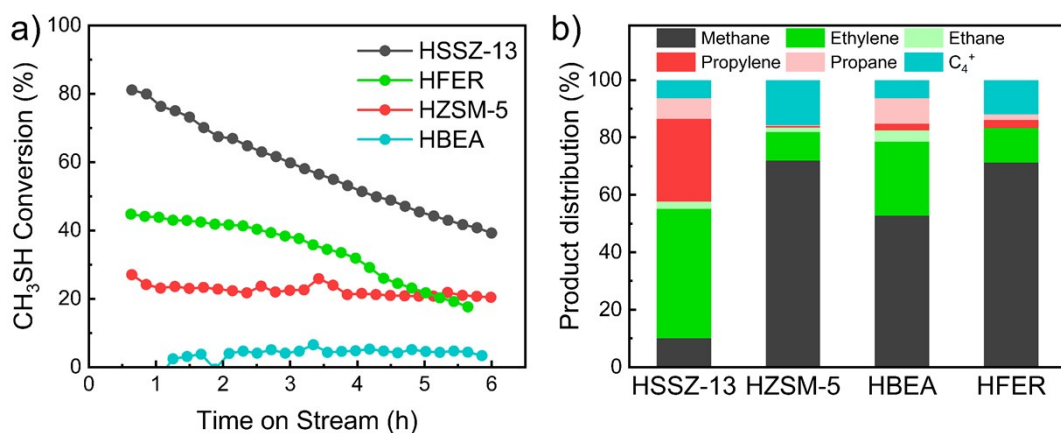

**Figure S7.** (a) CH<sub>3</sub>SH conversion and (b) carbon-based product distribution within first 2 h of respective reactions over HSSZ-13, HZSM-5, HBEA, and HFER. Conditions: 6 kPa of CH<sub>3</sub>OH/CH<sub>3</sub>SH in N<sub>2</sub> (5 mL/min), 450 °C, 100 mg of catalysts, 6 h.

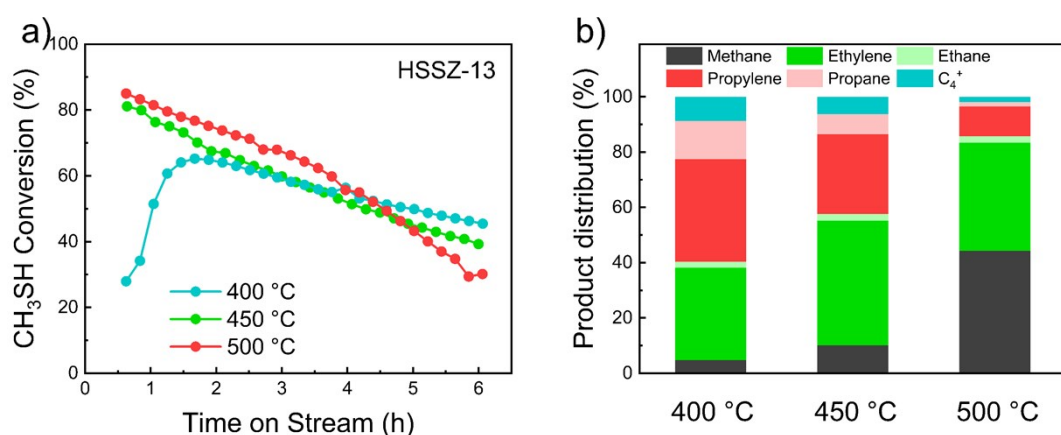

**Figure S8.** (a) CH<sub>3</sub>SH conversion and (b) carbon basis selectivity within first 2 h of HSSZ-13 of 6kPa of CH<sub>3</sub>SH in N<sub>2</sub> (5 mL/min) reaction at 400 °C, 450 °C and 500 °C for 6 h.

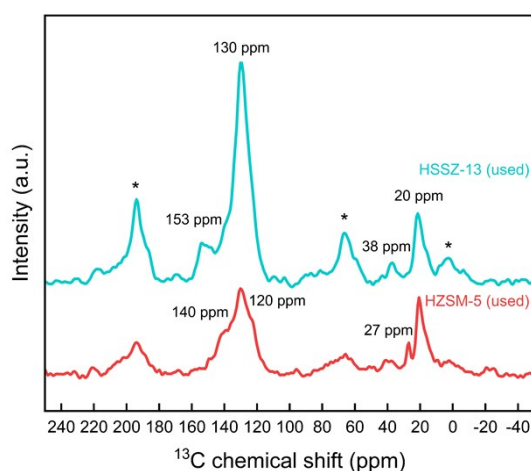

**Figure S9.** <sup>13</sup>C cross polarization NMR spectra of used HZSM-5 and HSSZ-13 after 6 h MtTO reaction at 450 °C. Asterisks denote spinning side bands.



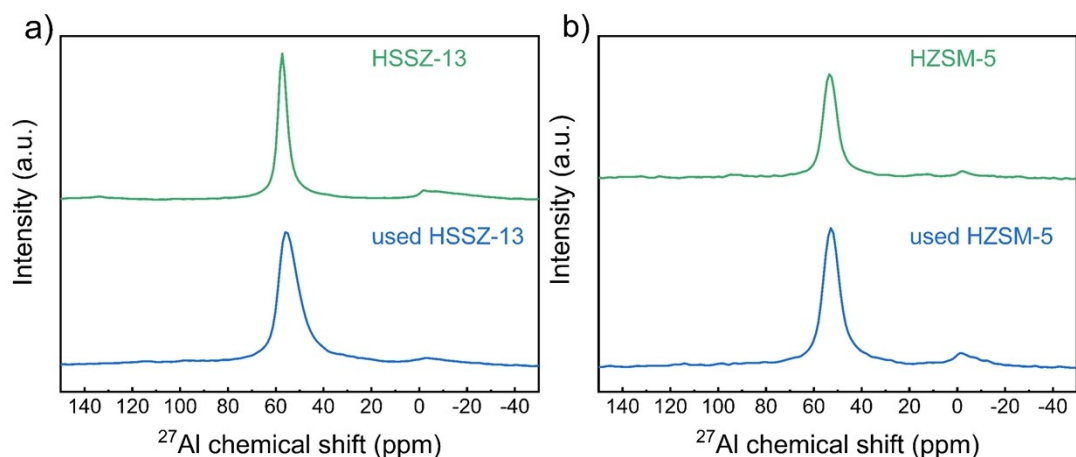

**Figure S10.**  $^{27}\text{Al}$  MAS NMR spectra of calcined and used (a) HSSZ-13 and (b) HZSM-5 zeolites.

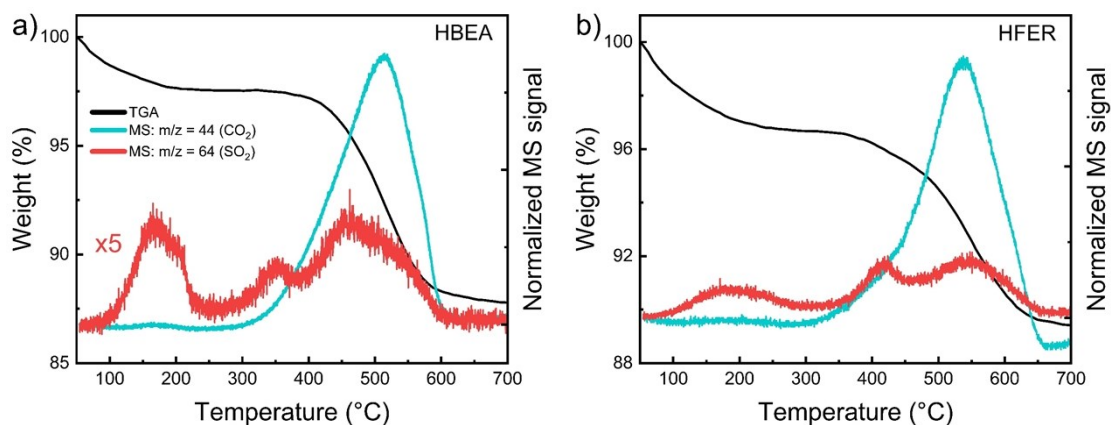

**Figure S11.** TGA curves and MS signals of  $\text{CO}_2$  ( $m/z = 44$ ) and  $\text{SO}_2$  ( $m/z = 64$ ) collected under air flow of used (a) HBEA and (b) HFER.

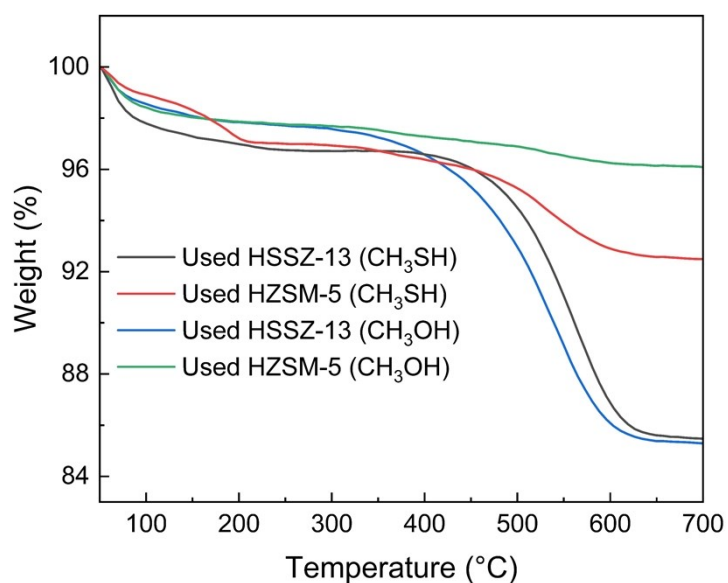

**Figure S12.** TGA curves of used HSSZ-13 and HZSM-5 after MTO and MtTO reaction.

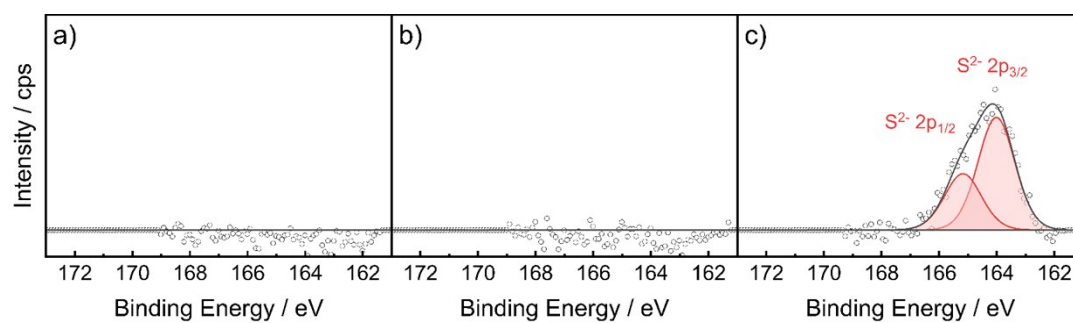

**Figure S13.** XPS spectra of S 2p region of used HSSZ-13 after 6 h reaction at (a) 400 °C, (b) 450 °C, and (c) 500 °C.

## References

- [1] A. Bolshakov, A. J. F. Van Hoof, B. Mezari, N. Kosinov, E. Hensen, *Catal. Sci. Technol.* **2019**, *9*, 6737–6748.
